## CORRECTION

# Correction: Physical and cognitive doping in university students using the unrelated question model (UQM): Assessing the influence of the probability of receiving the sensitive question on prevalence estimation

Pavel Dietz, Anne Quermann, Mireille Nicoline Maria van Poppel, Heiko Striegel, Hannes Schröter, Rolf Ulrich, Perikles Simon

There is an error in the fourth sentence of the second paragraph of the Statistics subsection of the Materials and methods section. The correct sentence is: Thus, one may assume a prevalence estimate of 0.23, 0.31, or 0.40 under  $p \approx 1/3$ .

## Reference

1. Dietz P, Quermann A, van Poppel MNM, Striegel H, Schröter H, Ulrich R, et al. (2018) Physical and cognitive doping in university students using the unrelated question model (UQM): Assessing the influence of the probability of receiving the sensitive question on prevalence estimation. PLoS ONE 13(5): e0197270. <https://doi.org/10.1371/journal.pone.0197270> PMID: 29763428

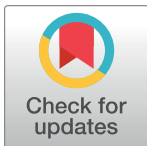

## OPEN ACCESS

**Citation:** Dietz P, Quermann A, van Poppel MNM, Striegel H, Schröter H, Ulrich R, et al. (2021) Correction: Physical and cognitive doping in university students using the unrelated question model (UQM): Assessing the influence of the probability of receiving the sensitive question on prevalence estimation. PLoS ONE 16(10): e0258705. <https://doi.org/10.1371/journal.pone.0258705>

**Published:** October 12, 2021

**Copyright:** © 2021 Dietz et al. This is an open access article distributed under the terms of the [Creative Commons Attribution License](https://creativecommons.org/licenses/by/4.0/), which permits unrestricted use, distribution, and reproduction in any medium, provided the original author and source are credited.
